# Supplementary material for: Spatially optimized quaternary phosphine oxide host materials for high-efficiency blue phosphorescence and thermally activated delayed fluorescence organic light-emitting diodes
Source: Royal Society of Chemistry journal article supplement (doi:10.1039/c5tc02726h), 2015-01-01
Supplement: c5tc02726h1.pdf [file c5tc02726h1.pdf]

## Supporting Information

### Optimizing Spatial Effect in Quaternary Phosphine Oxide Host Materials for High-Efficiency Blue Organic Light-Emitting Diodes

*Dongxue Ding, Zhen Zhang, Ying Wei, Pengfei Yan and Hui Xu\**

Key Laboratory of Functional Inorganic Material Chemistry, Ministry of Education, Heilongjiang  
University, 74 Xuefu Road, Harbin 150080 (P. R. China)

### Thermal Properties of 9CzFxPO

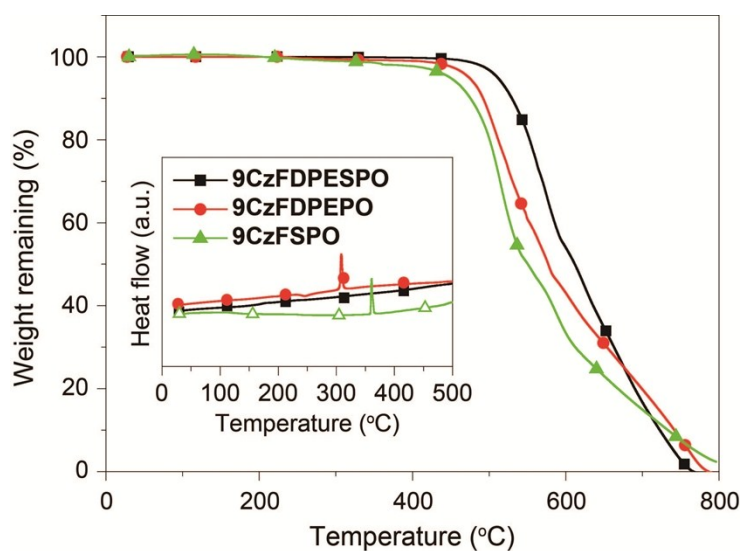

**Figure S1.** TGA and DSC (inset) curves of 9CzFxPO.

## Solid-State Optical Properties of 9CzFxPO

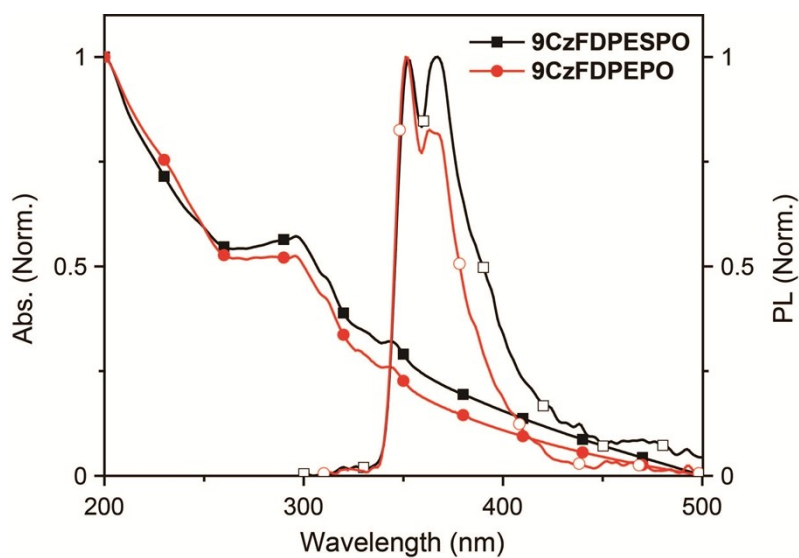

**Figure S2.** Absorption and emission curves of **9CzFxPO** in thin films.

## Volt-Ampere Characteristics of Light-Emitting Diodes

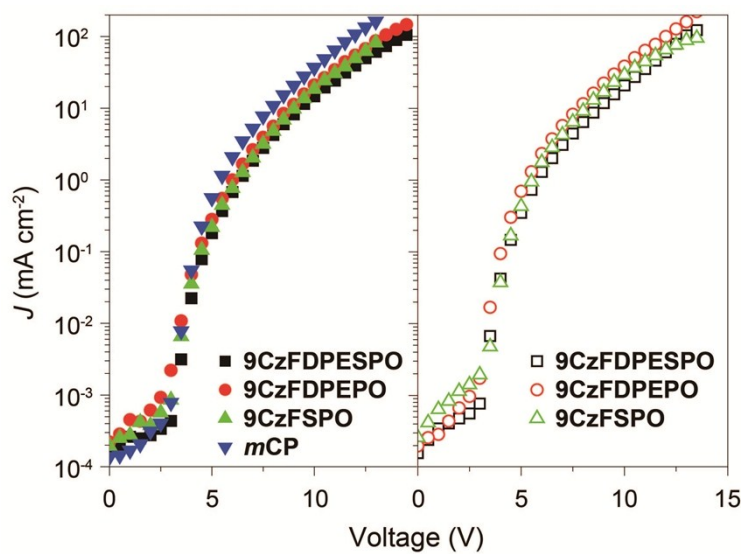

**Figure S3.**  $I$ - $V$  characteristics of 9CzFxPO based blue phosphorescence (solid symbol) and TADF light-emitting diodes (hollow symbol).

## Doping Concentration Dependence of EL Performance for Blue PHOLEDs

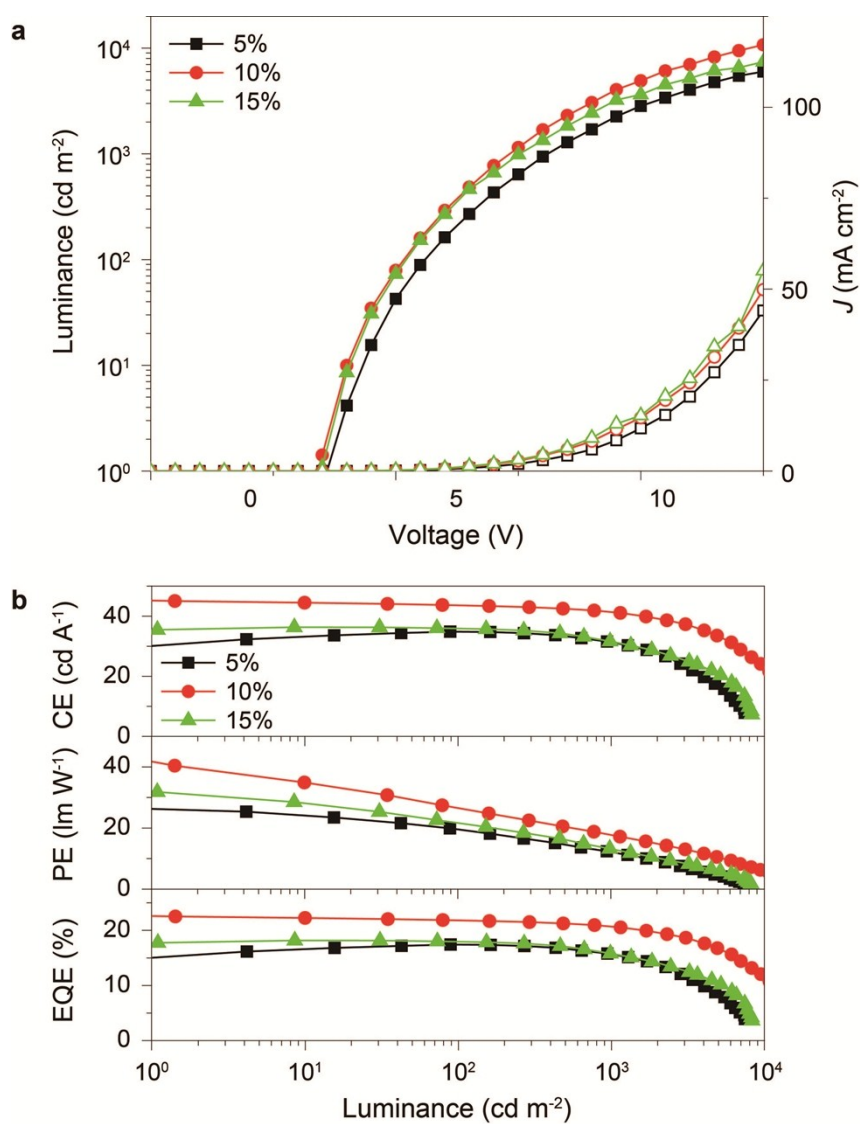

**Figure S4.** (a) Brightness- $J$ - $V$  curves of 9CzFDPESPO based blue PHOLEDs with various doping concentrations; (b) the dependence of device efficiencies on doping concentration for blue PHOLEDs.

## Doping Concentration Dependence of EL Performance for Blue TADF OLEDs

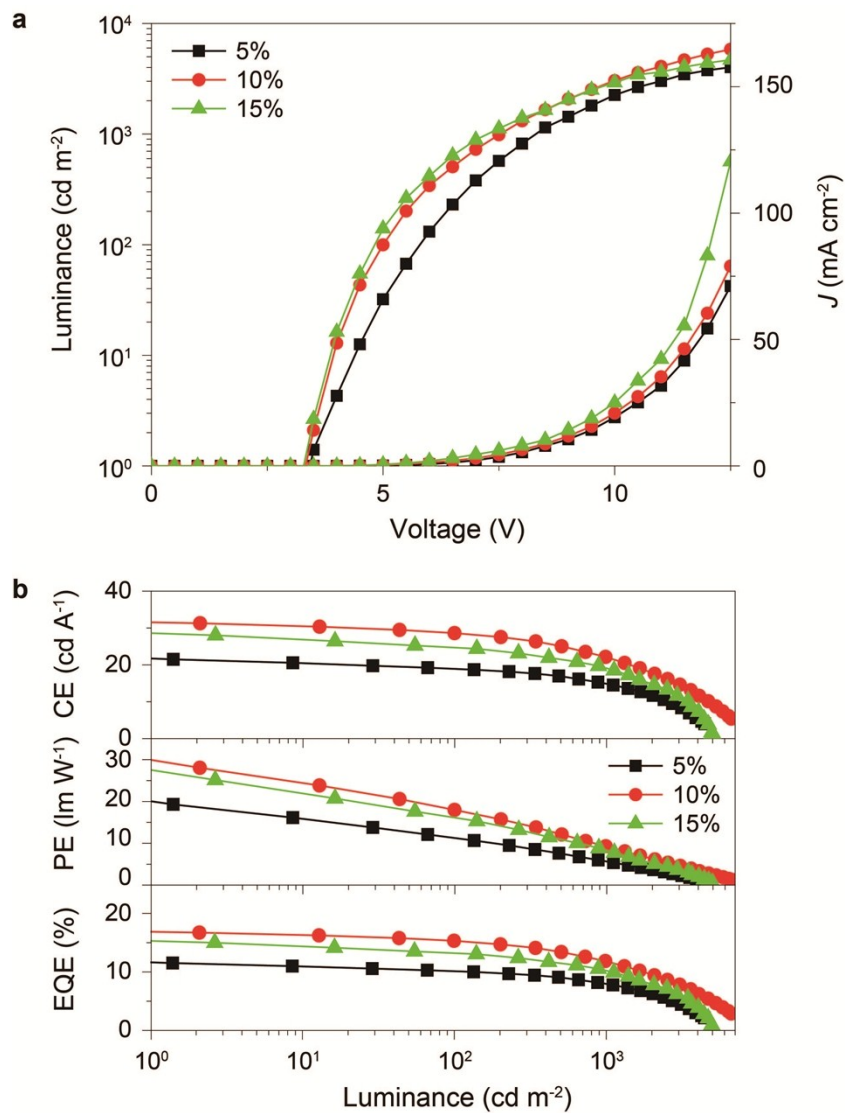

**Figure S5.** (a) Brightness- $J$ - $V$  curves of 9CzFDPEsPO based blue TADF OLEDs with various doping concentrations; (b) the dependence of device efficiencies on doping concentration for blue TADF OLEDs.
